# Supplementary material for: Adsorption and sensing performance of air pollutants on a β-TeO2 monolayer: a first-principles study
Source: Royal Society of Chemistry journal article supplement (doi:10.1039/d3cp04400a), 2023-12-04
Supplement: d3cp04400a1.pdf [file d3cp04400a1.pdf]

## Supplementary Information

### Adsorption and sensing performance of air pollutants on $\beta$ -TeO<sub>2</sub> monolayer: A first-principles study

Ying Wang<sup>a</sup>, Shiyong Guo,<sup>\*a</sup> Xiaoyong Xu<sup>a</sup>, Jing Pan<sup>a</sup>, Jingguo Hu<sup>a</sup>, Shengli Zhang<sup>\*b</sup>

<sup>a</sup> College of Physics Science and Technology, Yangzhou University, Yangzhou, 225009, Jiangsu, China. E-mail: [guosy@yzu.edu.cn](mailto:guosy@yzu.edu.cn)

<sup>b</sup> MIIT Key Laboratory of Advanced Display Materials and Devices, Ministry of Industry and Information Technology, Institute of Optoelectronics & Nanomaterials, Nanjing University of Science and Technology, Nanjing, 210094, Jiangsu, China. E-mail: [zhangslvip@njust.edu.cn](mailto:zhangslvip@njust.edu.cn)

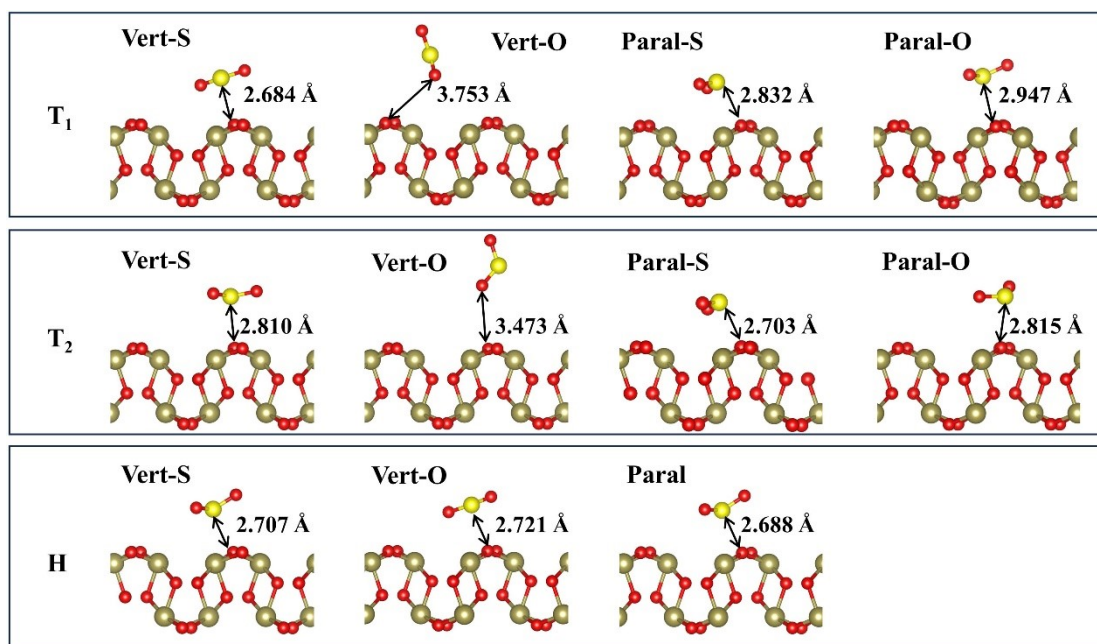

Fig. S1 The optimized atomic structures for SO<sub>2</sub> adsorbed on β-TeO<sub>2</sub> monolayer by different sites and different orientations.

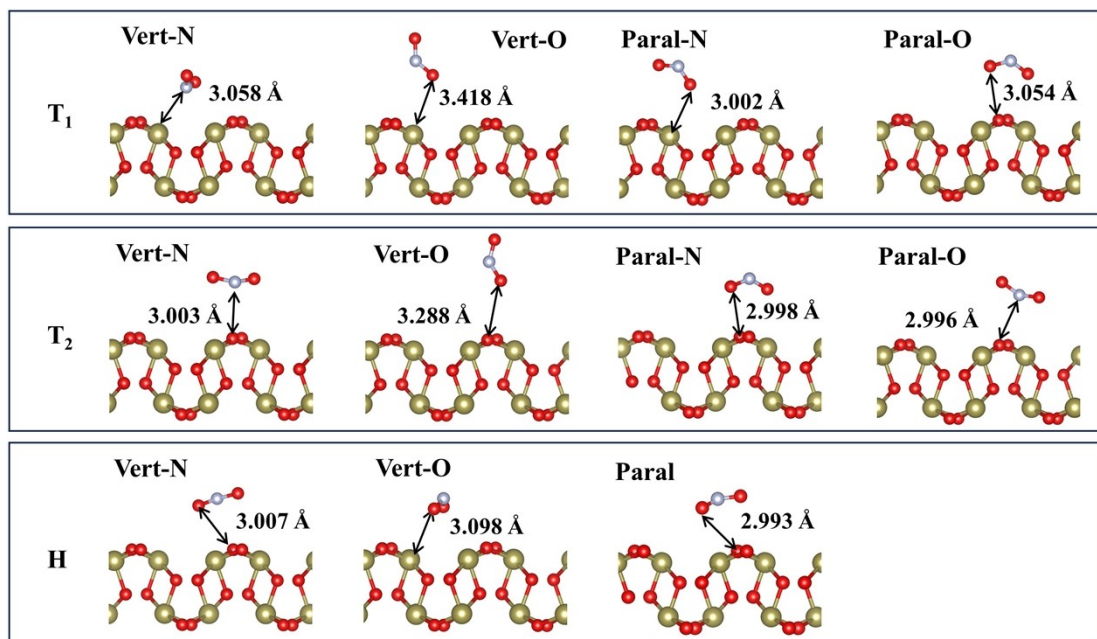

Fig. S2 The optimized atomic structures for NO<sub>2</sub> adsorbed on β-TeO<sub>2</sub> monolayer by different sites and different orientations.

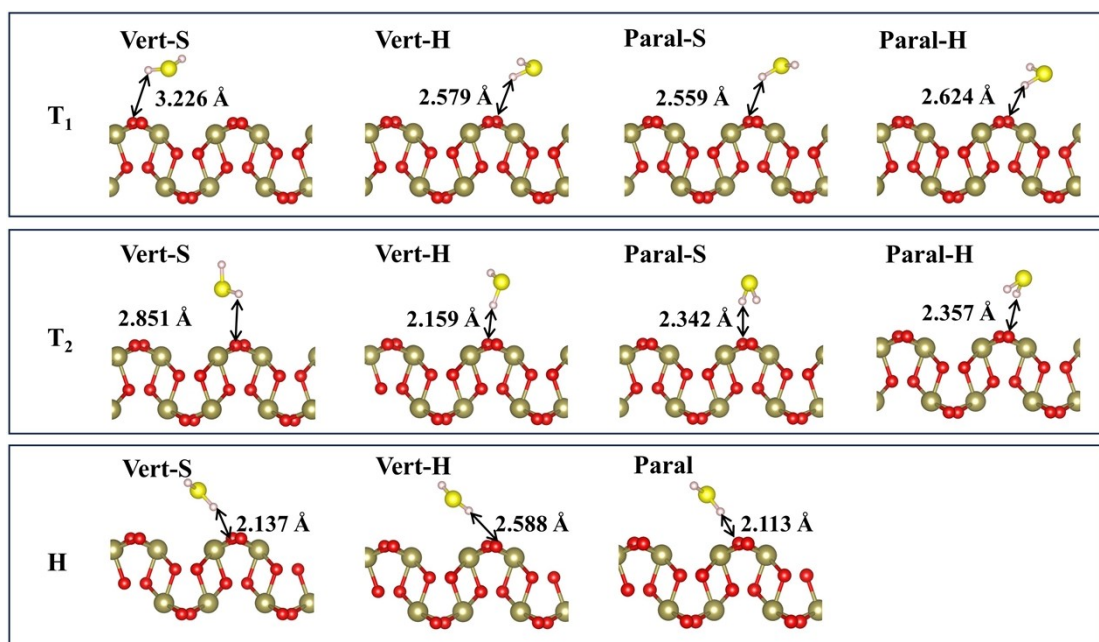

Fig. S3 The optimized atomic structures for  $H_2S$  adsorbed on  $\beta$ - $TeO_2$  monolayer by different sites and different orientations.

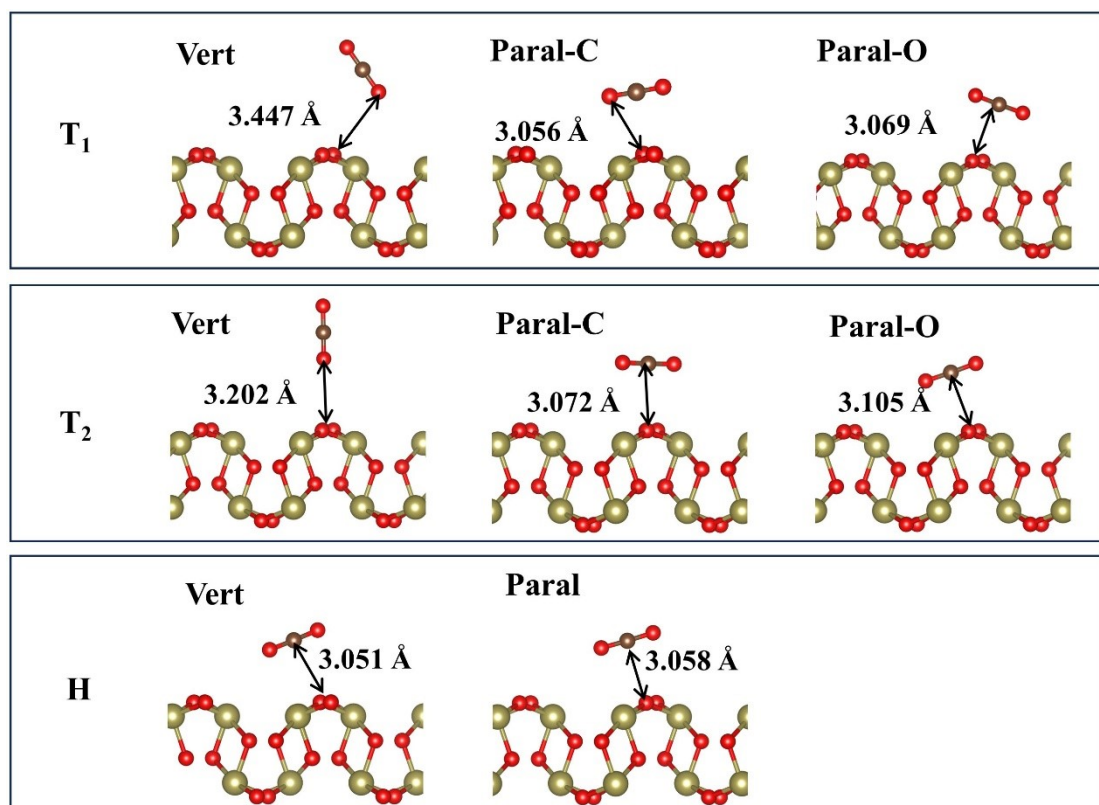

Fig. S4 The optimized atomic structures for  $CO_2$  adsorbed on  $\beta$ - $TeO_2$  monolayer by different sites and different orientations.

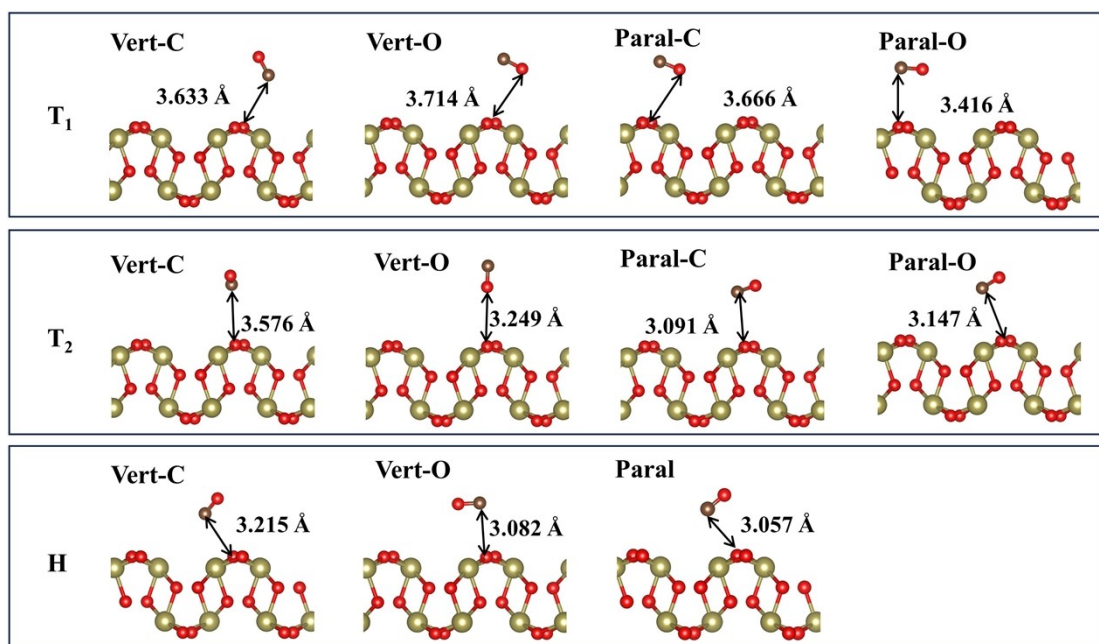

Fig. S5 The optimized atomic structures for CO adsorbed on  $\beta$ -TeO<sub>2</sub> monolayer by different sites and different orientations.

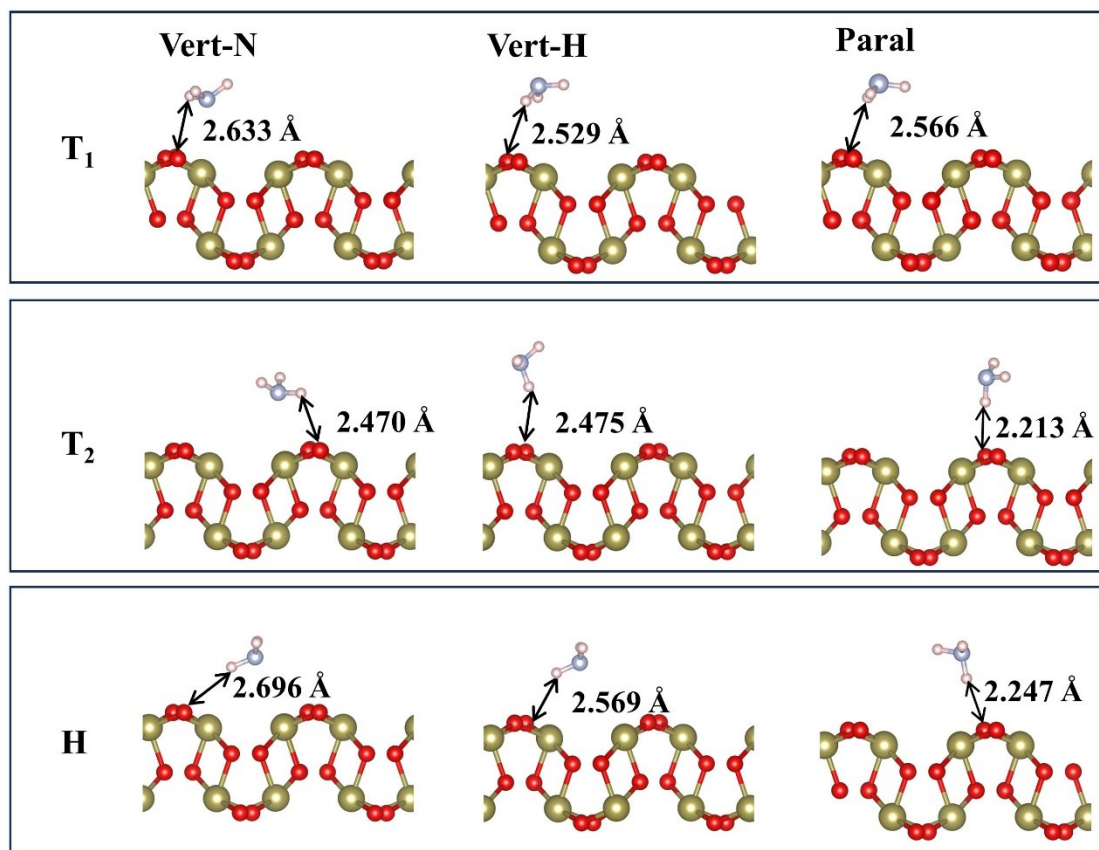

Fig. S6 The optimized atomic structures for NH<sub>3</sub> adsorbed on  $\beta$ -TeO<sub>2</sub> monolayer by different sites and different orientations.

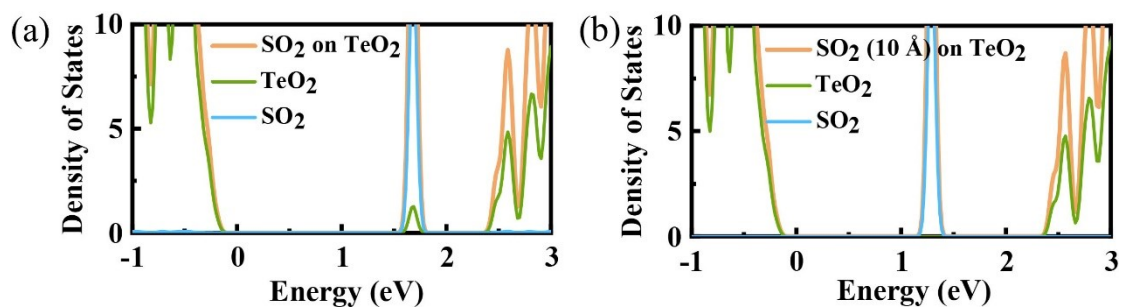

Fig. S7 The PDOS of (a) SO<sub>2</sub> adsorbed on the β-TeO<sub>2</sub> monolayer and (b) the system where SO<sub>2</sub> is positioned 10 Å above the β-TeO<sub>2</sub> monolayer. The Fermi level is assigned to 0 eV.

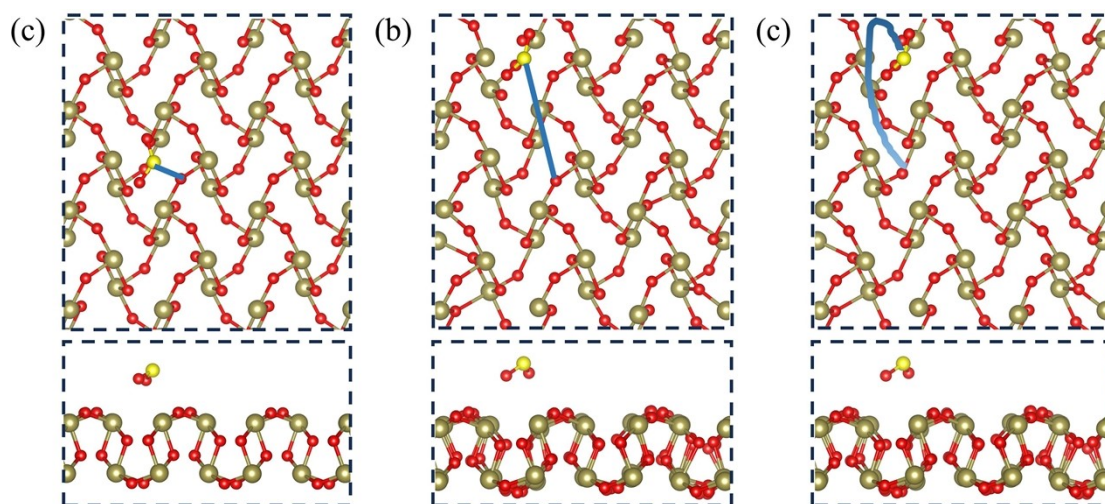

Fig. S8 Results of AIMD simulations performed for SO<sub>2</sub> on β-TeO<sub>2</sub> monolayer: the atomic structures at (a) 0 ps and (b) 5 ps, and (c) projection of gas molecule trajectory.

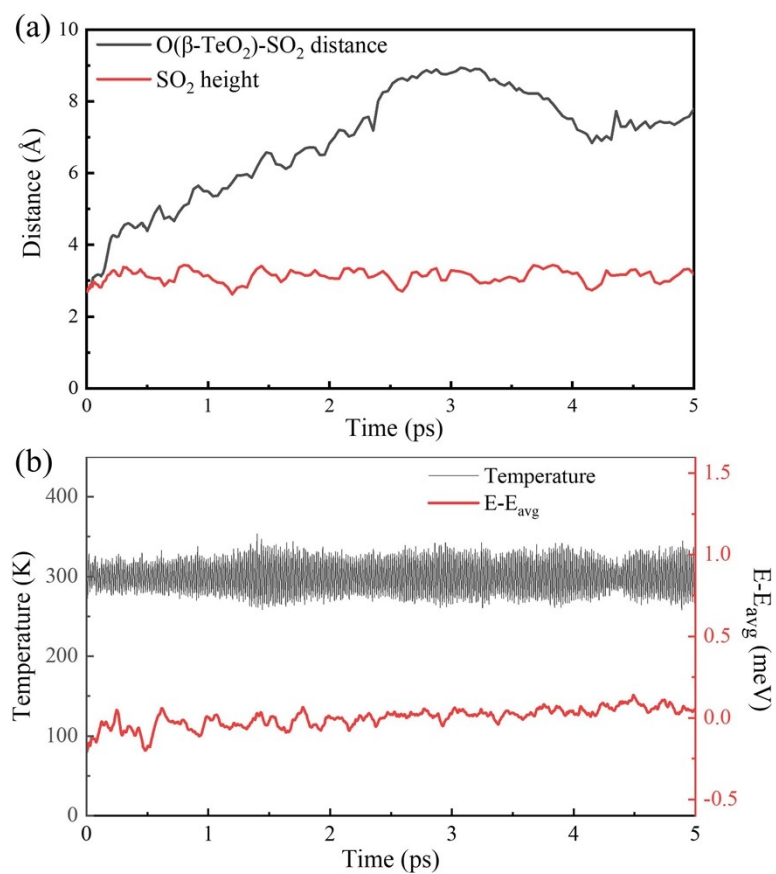

Fig. S9 Results of AIMD simulations performed for SO<sub>2</sub> adsorbed on  $\beta$ -TeO<sub>2</sub> monolayer at 300 K: (a) time dependencies of O( $\beta$ -TeO<sub>2</sub>)-SO<sub>2</sub> distance and SO<sub>2</sub> height above  $\beta$ -TeO<sub>2</sub> monolayer, (b) variation of total energy during simulations.

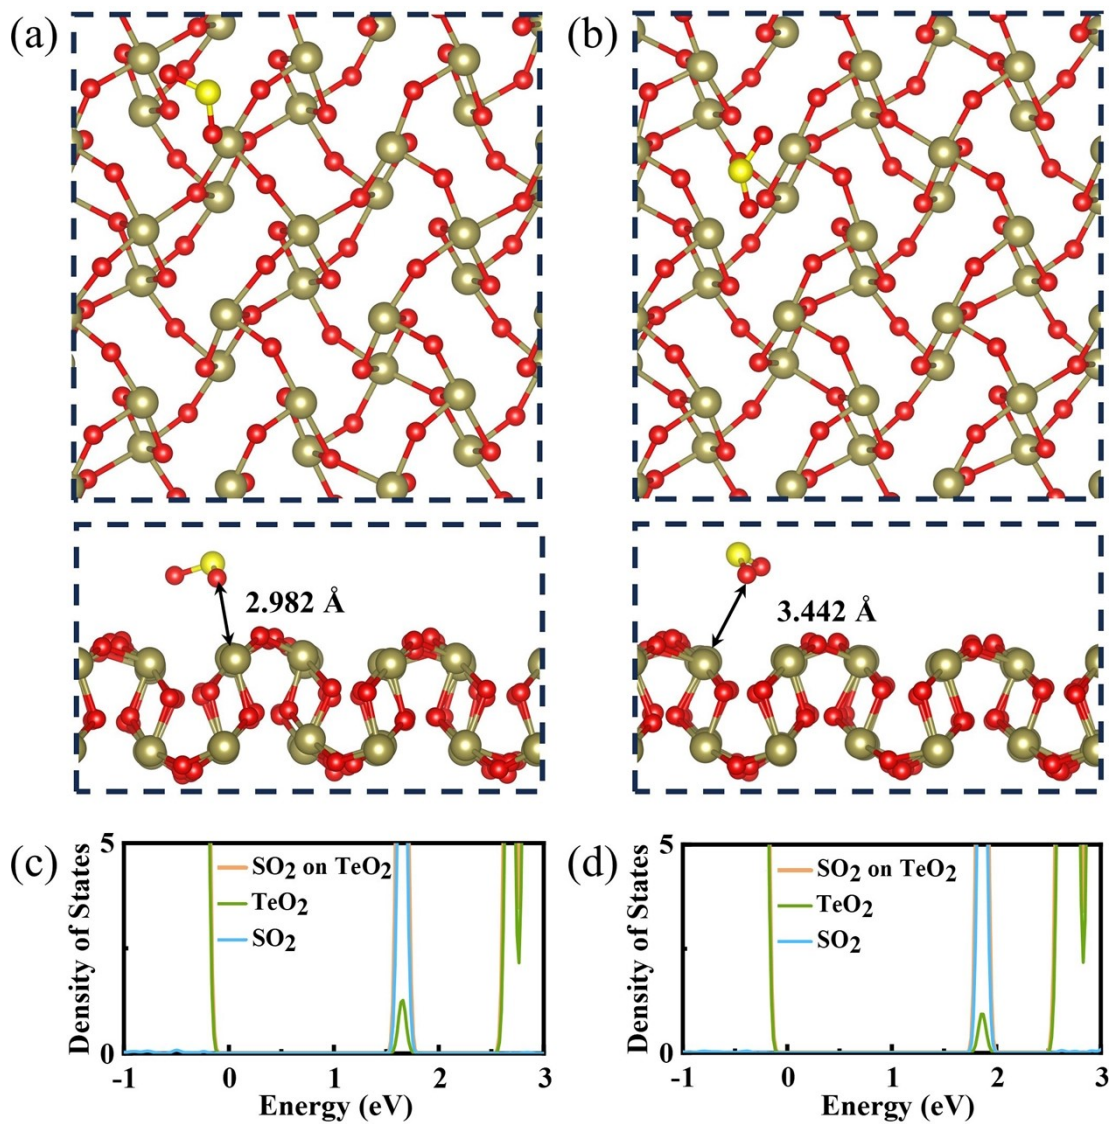

Fig. S10 Atomic structures and the related projected density of states of two alternative adsorption configurations with the adsorption distances of 2.982 Å and 3.442 Å during the AIMD simulations.
